# Supplementary material for: Rolling and unrolling of graphene sheets via in situ generation of superparamagnetic iron oxide nanoparticles
Source: Royal Society of Chemistry journal article supplement (doi:10.1039/c9cp01507h), 2019-01-01
Supplement: c9cp01507h1.pdf [file c9cp01507h1.pdf]

Supplementary Information

## **Rolling and unrolling of graphene sheets via in-situ generation of superparamagnetic iron oxide nanoparticles**

Meera Sathyan,<sup>a</sup> M. K. Jayaraj<sup>bc</sup> and Honey John<sup>abc\*</sup>

Department of Polymer Science and Rubber Technology

Inter University Centre for Nanomaterials and Devices (IUCND)

Centre for excellence in Advanced Materials

Cochin University of Science and Technology

\*Corresponding author E-mail: honey@cusat.ac.in.

### **Experimental**

Materials: Graphite powder (<20 $\mu$ m) was obtained from Sigma Aldrich, H<sub>2</sub>SO<sub>4</sub> (98%) , 50% Hydrogen peroxide (H<sub>2</sub>O<sub>2</sub>), Potassium permanganate (KMnO<sub>4</sub>), were purchased from Merck India. Ferrous Sulphate heptahydrate (FeSO<sub>4</sub>.7H<sub>2</sub>O, 98.5%, Merck), Ferric Chloride hexahydrate (FeCl<sub>3</sub>.6H<sub>2</sub>O ,97% Sigma Aldrich) . Ammonium hydroxide (25%, Merck) Cetyl trimethyl ammonium bromide, CTAB (98%Merck) were used for the synthesis of Fe<sub>3</sub>O<sub>4</sub> nanoparticles. Aqueous solutions were prepared with ultrapure water (18 M $\Omega$ ). All chemicals were analytical grade and used without further purification.

### **Synthesis of GO**

Graphene oxide (GO) was prepared by modified Hummer's method which employed acid oxidation of graphite powder at low temperature. Graphite powder was added to 98% sulphuric acid and stirred for 12 h at room temperature. Potassium permanganate (4 g) was gradually added after cooling the solution below 10 °C. Finally the reaction was arrested by adding 150 ml water and 30% 10 ml H<sub>2</sub>O<sub>2</sub>. The suspension

was washed several times with distilled water and eventually filtered using filtration apparatus. The endmost product was dried at 60 °C under vacuum for 12h.

### **Reduction to rGO**

The GO powder (1g/ml) was suspended in 20 ml distilled water and bathsonicated for 20 minutes. The solution was then transferred to Teflon-lined stainless steel hydrothermal autoclave and was kept in air oven at 180 °C for 6 hours.

### **Preparation of Fe<sub>3</sub>O<sub>4</sub> decorated graphene nanoscroll**

Graphene nanoscroll was synthesised by chemical coprecipitation of Fe<sub>3</sub>O<sub>4</sub> from suspended GO solution. In a typical experiment, FeCl<sub>3</sub>.6H<sub>2</sub>O and FeSO<sub>4</sub>.7H<sub>2</sub>O [Fe<sup>2+</sup>: Fe<sup>3+</sup>=1:2] were dissolved in 40 ml deionised water with vigorous stirring and was added to suspended hydrothermally reduced GO solution. To this solution source under vigorous stirring, NH<sub>4</sub>OH was added drop-wise. Nitrogen gas was continuously purged throughout the reaction. The solution mixture was then transferred to hydrothermal autoclave and heated to 100 °C for 24 hours. Dark brown mixture of Fe<sub>3</sub>O<sub>4</sub> –GNS was obtained, washed by deionized water and finally, the product was separated by filtration. Lastly the Fe<sub>3</sub>O<sub>4</sub> –GNS was dried at 60 °C under vacuum.

### **Material characterisation**

Transmission Electron Microscopy (TEM) images were obtained using HRTEM JEOL JEM -2100. XPS measurements were performed on PHI 5000 Versa Probe using Al K $\alpha$  x-ray source. The XRD patterns were taken by High Resolution X-Ray diffractometer (PANalytical x'pert PRO) equipped with Cu-K $\alpha$  as radiation source ( $\lambda = 1.5405 \text{ \AA}$ ) with a step width of 0.05°. Magnetic measurements of Fe<sub>3</sub>O<sub>4</sub> nanoparticles were done using Quantum Design make, Versa lab, and physical property measurement system. The hysteresis curve was measured under a magnetic field strength sweeping from -15 to +15 kOe at room temperature.

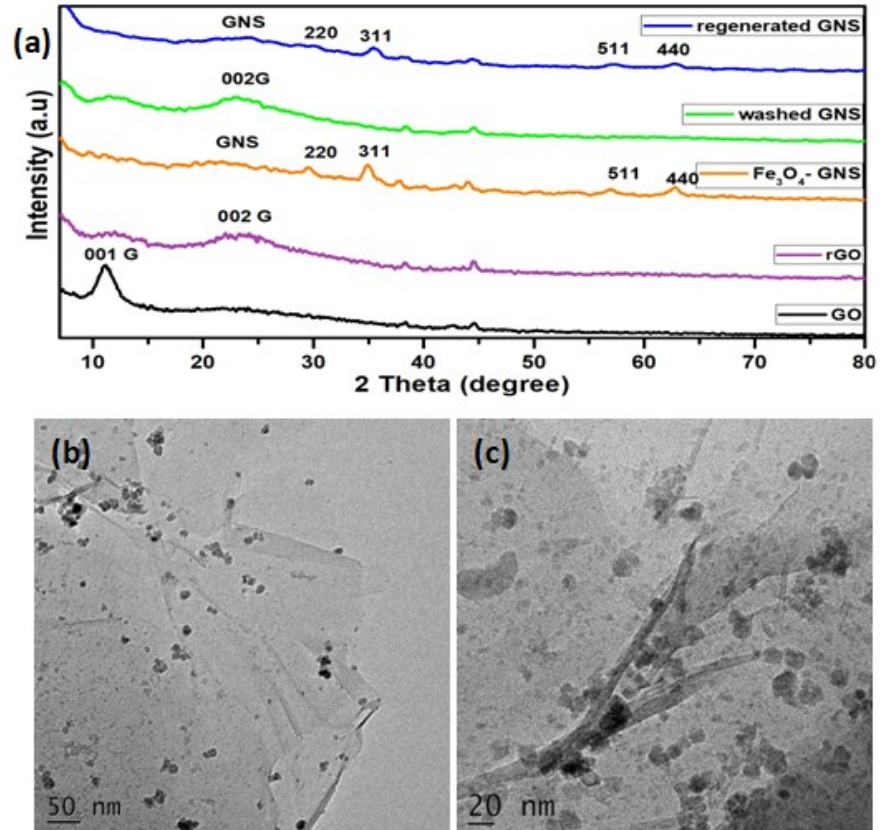

**Figure S1** (a) XRD images of GO, rGO,  $\text{Fe}_3\text{O}_4$  – GNS, GNS washed using HCl to remove iron oxide nanoparticles, regenerated GNS by decoration with  $\text{Fe}_3\text{O}_4$  (b) TEM image of GO (without hydrothermal reduction)-  $\text{Fe}_3\text{O}_4$  hybrid.

The XRD pattern of GO shows peaks at  $11^\circ$  and  $44.4^\circ$  corresponding to 001 and 101 diffraction planes respectively. After hydrothermal reduction, a broad peak at  $24.3^\circ$  developed indicating the deep reduction of GO. The peaks at  $30.1^\circ$ ,  $35.5^\circ$ ,  $57.1^\circ$ ,  $62.6^\circ$  corresponds to (220), (311), (511) and (440) planes of  $\text{Fe}_3\text{O}_4$  (JCPDS 75-0033) while the broad peak at  $24^\circ$  corresponds to GNS. After washing, all peaks corresponding to magnetite disappeared indicating complete removal of iron oxide from the hybrid.

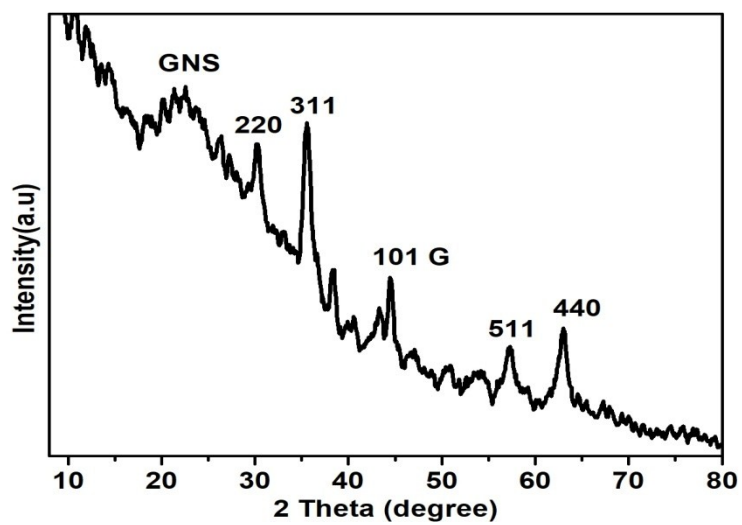

Figure S2 XRD pattern of Fe<sub>3</sub>O<sub>4</sub>-GNS

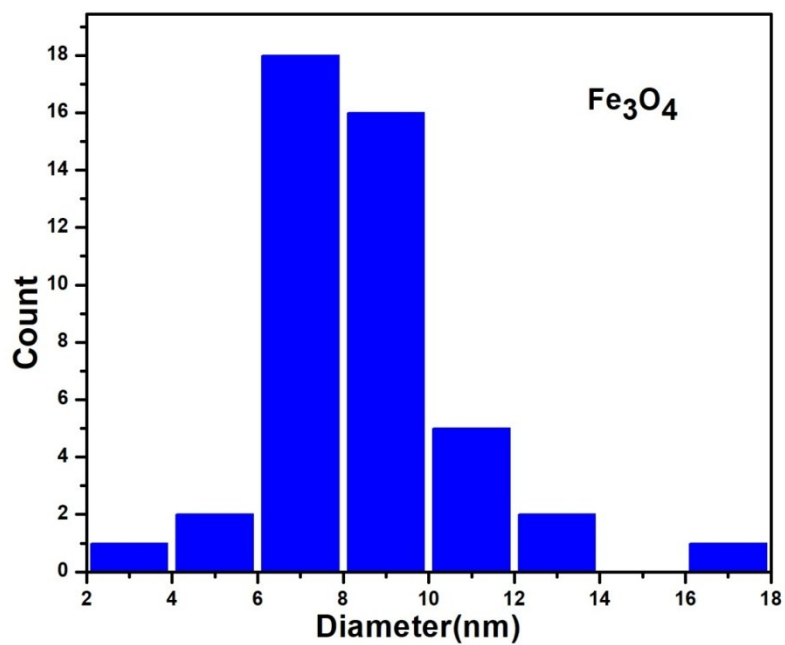

Figure S3 Histogram of statistical analysis for Fe<sub>3</sub>O<sub>4</sub> nanoparticles in Fe<sub>3</sub>O<sub>4</sub>-GNS

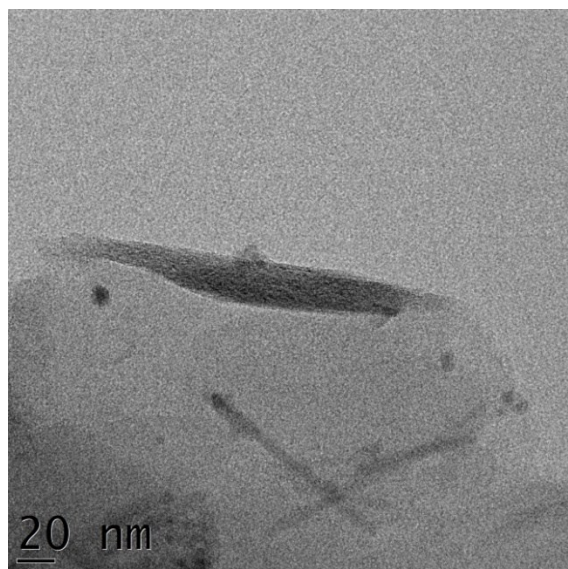

**Figure S4** A portion of graphene sheet tending to scroll

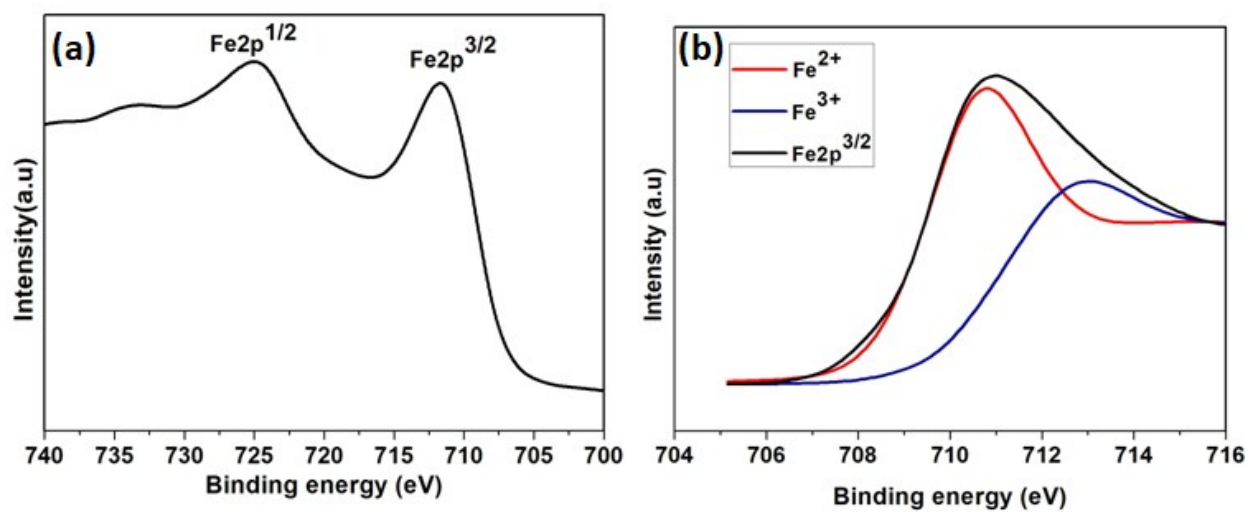

**Figure S5** (a) Fe  $2p^{1/2}$  and  $2p^{3/2}$  peaks in the XPS spectra of  $\text{Fe}_3\text{O}_4$  nanoparticles. (b) The deconvoluted  $\text{Fe}2p^{3/2}$  spectra

XPS spectra given in Figure S5 display bands assigned to  $\text{Fe} 2p^{1/2}$  at 724 eV and  $\text{Fe} 2p^{3/2}$  at 710 eV in  $\text{Fe}_3\text{O}_4$ . The spectral deconvolution of  $\text{Fe} 2p^{3/2}$  gives two signals of  $\text{Fe}^{2+}$  at 710.4 eV and  $\text{Fe}^{3+}$  at 712.5 eV.
